# Supplementary material for: Integrated recycling of valuable elements from spent LiFePO4 batteries: a green closed-loop process
Source: Royal Society of Chemistry journal article supplement (doi:10.1039/d3gc02180g), 2023-01-01
Supplement: d3gc02180g1.pdf [file d3gc02180g1.pdf]

**Supporting Information for**  
**Integrated recycling of valuable elements from spent LiFePO<sub>4</sub>**  
**batteries: a green closed-loop process**

**Huixiang Zhou<sup>a</sup>, Yun Zhang<sup>a</sup>, Liqing Li<sup>b</sup>, Zhanfang Cao<sup>a,\*</sup>**

<sup>a</sup> College of Chemistry and Chemical Engineering, Central South University, Changsha 410083, China

<sup>b</sup> Faculty of Materials Metallurgy and Chemistry, Jiangxi University of Science and Technology, Ganzhou 341000,

China

\* Zhanfang Cao is the Corresponding author.

Corresponding author. Tel.: +86 731 88879616 (Zhanfang Cao)

E-mail address: zfcaocsu@163.com (Zhan-fang Cao)

**Table S1** Concentrations of the elements in the filtrate obtained by the leaching process

| Content              | Li   | Fe  | P   | Al    |
|----------------------|------|-----|-----|-------|
| Concentration (mg/L) | 3826 | 283 | 258 | 0.003 |

**Table S2** Fitting parameters ( $R^2$ ) of leaching Li using different models

| Temperature<br>(°C) | Model a<br>$R^2$ | Model b<br>$R^2$ | Model c<br>$R^2$ | Model d<br>$R^2$ |
|---------------------|------------------|------------------|------------------|------------------|
| 25                  | 0.9441           | 0.9489           | 0.9959           | 0.9989           |
| 35                  | 0.9460           | 0.9432           | 0.9945           | 0.9964           |
| 45                  | 0.8067           | 0.7936           | 0.8988           | 0.9733           |
| 55                  | 0.8222           | 0.8096           | 0.8579           | 0.9669           |

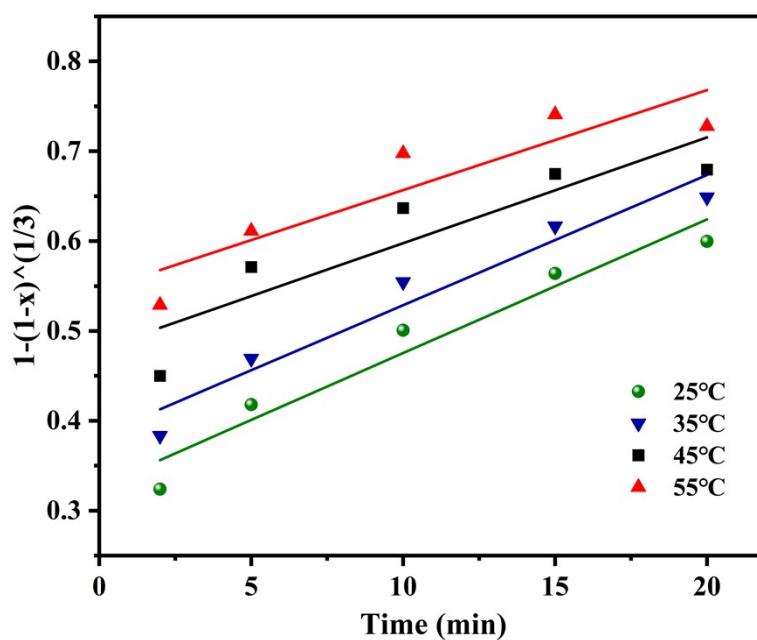

Fig. S1 Fitting results of Model a at various leaching temperatures for Li.

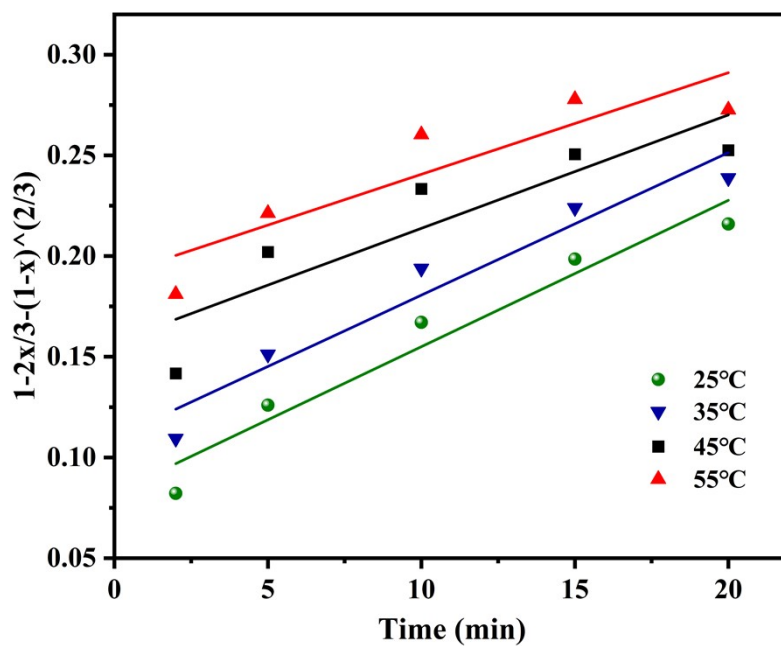

Fig. S2 Fitting results of the Model b at various leaching temperatures for Li.

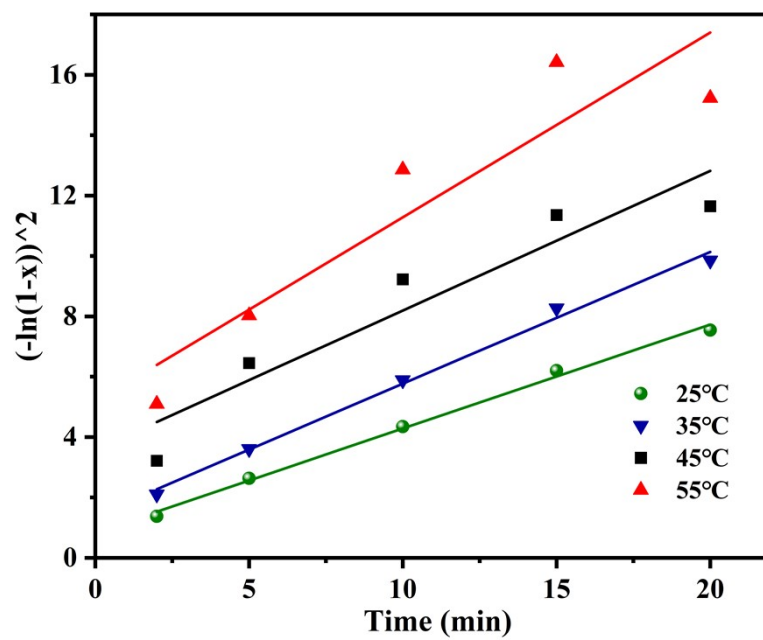

Fig. S3 Fitting results of the Model c at various leaching temperatures for Li.

**Table S3.** Equilibrium equations relative to the  $E$ -pH diagram of the Li-Fe-P-H<sub>2</sub>O system at 298.15 K[1]

| No. | Reactions                                                                                                                                                                      | $E$ vs pH equations                                                                   |
|-----|--------------------------------------------------------------------------------------------------------------------------------------------------------------------------------|---------------------------------------------------------------------------------------|
| 1   | $2\text{H}^+ + 2\text{e} = \text{H}_2$                                                                                                                                         | $E = -0.0592 \text{ pH}$                                                              |
| 2   | $\text{O}_2 + 4\text{e} + 4\text{H}^+ = 2\text{H}_2\text{O}$                                                                                                                   | $E = 1.229 - 0.0592 \text{ pH}$                                                       |
| 3   | $\text{Fe}^{3+} + \text{e} = \text{Fe}^{2+}$                                                                                                                                   | $E = 0.7696 - 0.0592 \lg [\text{Fe}^{2+}]/[\text{Fe}^{3+}]$                           |
| 4   | $\text{FePO}_4 \cdot 2\text{H}_2\text{O} + 3\text{H}^+ = \text{Fe}^{3+} + \text{H}_3\text{PO}_4 + 2\text{H}_2\text{O}$                                                         | $\text{pH} = -3.482 - 1/3 \lg [\text{Fe}^{3+}][\text{H}_3\text{PO}_4]$                |
| 5   | $\text{FePO}_4 \cdot 2\text{H}_2\text{O} + 3\text{H}^+ + \text{e} = \text{Fe}^{2+} + \text{H}_3\text{PO}_4 + 2\text{H}_2\text{O}$                                              | $E = 0.1515 - 0.0592 \lg [\text{Fe}^{2+}][\text{H}_3\text{PO}_4] - 0.1775 \text{ pH}$ |
| 6   | $\text{Fe}_3(\text{PO}_4)_2 \cdot n\text{H}_2\text{O} + 6\text{H}^+ = 3\text{Fe}^{2+} + 2\text{H}_3\text{PO}_4 + n\text{H}_2\text{O}$                                          | $\text{pH} = 0.3654 - 1/3 \lg [\text{H}_3\text{PO}_4] - 1/2 \lg [\text{Fe}^{2+}]$     |
| 7   | $3\text{FePO}_4 \cdot 2\text{H}_2\text{O} + 3\text{e} + 3\text{H}^+ = \text{Fe}_3(\text{PO}_4)_2 \cdot n\text{H}_2\text{O} + \text{H}_3\text{PO}_4 + (6-n) \text{H}_2\text{O}$ | $E = 0.1083 - 0.0197 \lg [\text{H}_3\text{PO}_4] - 0.0592 \text{ pH}$                 |
| 8   | $3\text{LiFePO}_4 + n\text{H}_2\text{O} + 3\text{H}^+ = \text{Fe}_3(\text{PO}_4)_2 \cdot n\text{H}_2\text{O} + 3\text{Li}^+ + \text{H}_3\text{PO}_4$                           | $\text{pH} = 1.1112 - \lg [\text{Li}^+] - 1/3 \lg [\text{H}_3\text{PO}_4]$            |
| 9   | $\text{LiFePO}_4 + 3\text{H}^+ = \text{Fe}^{2+} + \text{Li}^+ + \text{H}_3\text{PO}_4$                                                                                         | $\text{pH} = 0.6137 - 1/3 \lg [\text{Li}^+][\text{Fe}^{2+}][\text{H}_3\text{PO}_4]$   |
| 10  | $\text{FePO}_4 \cdot 2\text{H}_2\text{O} + \text{Li}^+ + \text{e} = \text{LiFePO}_4 + 2\text{H}_2\text{O}$                                                                     | $E = 0.0426 + 0.0592 \lg [\text{Li}^+]$                                               |
| 11  | $\text{Li}_3\text{PO}_4 + \text{Fe}(\text{OH})_3 + 3\text{H}^+ = \text{FePO}_4 \cdot 2\text{H}_2\text{O} + 3\text{Li}^+ + \text{H}_2\text{O}$                                  | $\text{pH} = 6.0831 - \lg [\text{Li}^+]$                                              |
| 12  | $\text{Fe}(\text{OH})_3 + \text{Li}_3\text{PO}_4 + 3\text{H}^+ + \text{e} = \text{LiFePO}_4 + 2\text{Li}^+ + 3\text{H}_2\text{O}$                                              | $E = 1.1224 - 0.1183 \lg [\text{Li}^+] - 0.1775 \text{ pH}$                           |
| 13  | $\text{Fe}(\text{OH})_2 + \text{Li}_3\text{PO}_4 + 2\text{H}^+ = \text{LiFePO}_4 + 2\text{H}_2\text{O} + 2\text{Li}^+$                                                         | $\text{pH} = 7.4167 - \lg [\text{Li}^+]$                                              |
| 14  | $\text{Fe}(\text{OH})_3 + \text{H}^+ + \text{e} = \text{Fe}(\text{OH})_2 + \text{H}_2\text{O}$                                                                                 | $E = 0.2447 - 0.0592 \text{ pH}$                                                      |

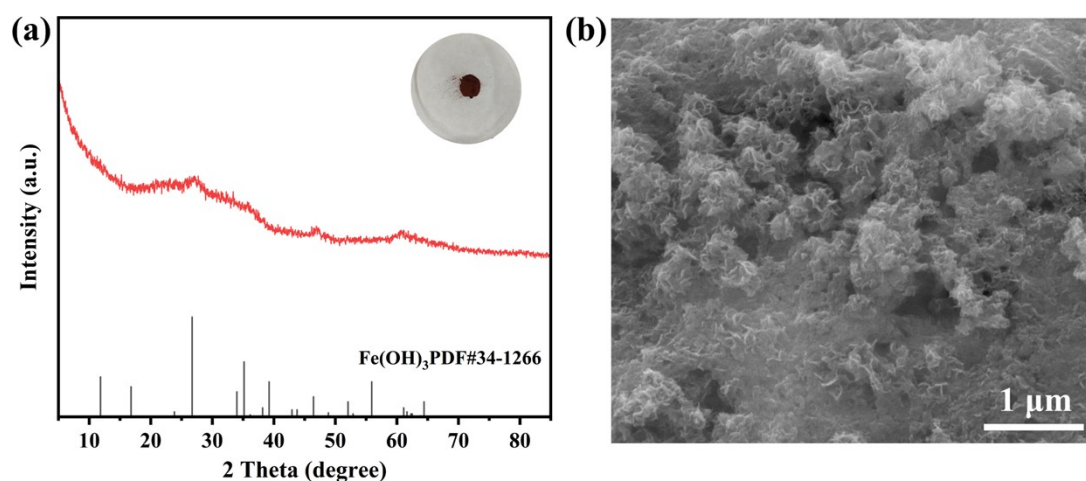

Fig. S4 (a) XRD pattern and (b) SEM image of the iron precipitation.

**Table S4.** Composition analysis of leaching residue under the optimized process

| Content            | FePO <sub>4</sub> | Fe    | Li   | P     | Al   |
|--------------------|-------------------|-------|------|-------|------|
| Composition (wt.%) | 99.78             | 39.56 | 0.24 | 19.67 | 0.01 |

**Table S5.** Purity analysis of the final product for Li<sub>2</sub>CO<sub>3</sub> under the optimized process

| Content            | Li <sub>2</sub> CO <sub>3</sub> | Na     | Fe     | P      | Al    |
|--------------------|---------------------------------|--------|--------|--------|-------|
| Composition (wt.%) | 99.63                           | 0.0238 | 0.0001 | 0.0105 | 0.001 |

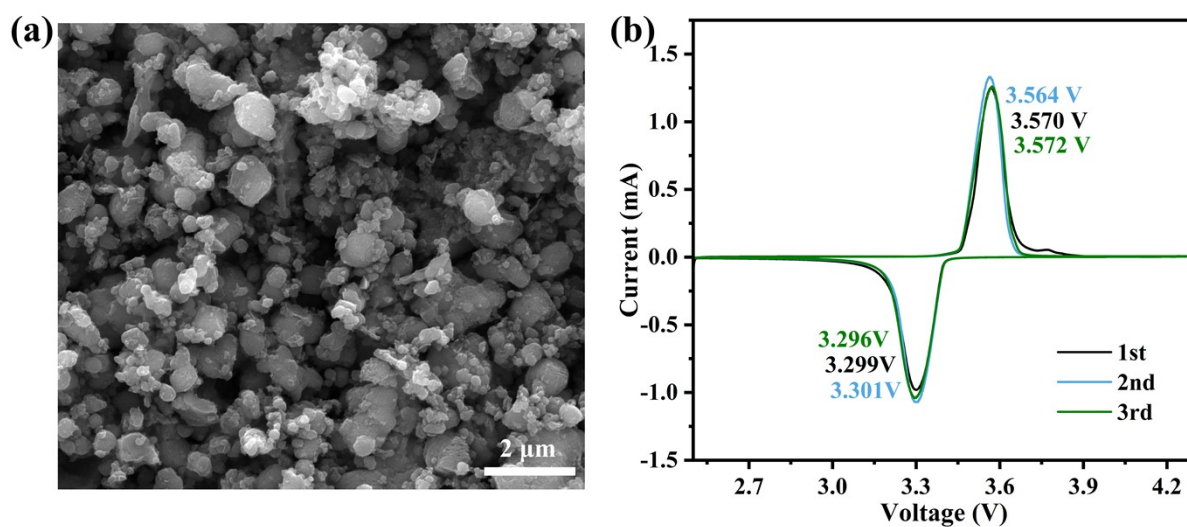

Fig. S5 (a) SEM image of RLFP, (b) cyclic voltammogram of RLFP at 0.1 mV s<sup>-1</sup>.

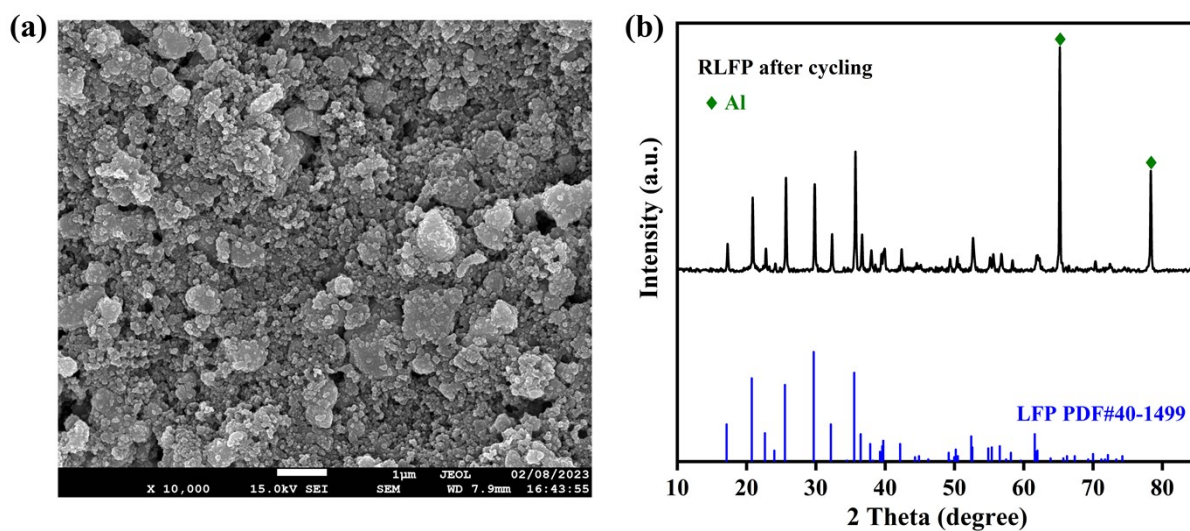

Fig. S6 (a) SEM and (b) XRD of RLFP cathode sheet after cycling.

**Table S6.** The cost and profit to dispose of 1 kg spent LiFePO<sub>4</sub> cathode powder in China (exchange rate: 1 \$ = 7.0338 CNY, accessed June 12, 2023).

|             | Chemical                               | Price                       | Dosage     | Total     |
|-------------|----------------------------------------|-----------------------------|------------|-----------|
| Consumption | SLFP                                   | 6.823 \$/kg                 | 1.0 kg     | 6.823 \$  |
|             | H <sub>2</sub> O <sub>2</sub> (30 wt%) | 0.138\$/L                   | 0.4 L      | 0.055 \$  |
|             | DL-H <sub>2</sub> Ma                   | 2.133 \$/kg                 | 0.322 kg   | 0.687 \$  |
|             | NaOH                                   | 0.427\$/kg                  | 0.004 kg   | 0.0017 \$ |
|             | Na <sub>2</sub> CO <sub>3</sub>        | 0.355\$/kg                  | 0.284 kg   | 0.101 \$  |
|             | Electricity                            | 0.142 \$/kw·h <sup>-1</sup> | 2.685 kw·h | 0.381 \$  |
|             | Water                                  | 0.06 \$/t                   | 0.3 t      | 0.018 \$  |
|             | Labor                                  | 200 \$/t                    | 0.001 t    | 0.2 \$    |
| Total       | 8.267\$                                |                             |            |           |
|             | Chemical                               | Price                       | Dosage     | Total     |
| Product     | FePO <sub>4</sub>                      | 2.133 \$/kg                 | 0.730 kg   | 1.557 \$  |
|             | Li <sub>3</sub> PO <sub>4</sub>        | 4.976 \$/kg                 | 0.022 kg   | 0.109 \$  |
|             | Li <sub>2</sub> CO <sub>3</sub>        | 42.651 \$/kg                | 0.195 kg   | 8.317 \$  |
| Total       | 9.983 \$                               |                             |            |           |
| Profit      | 1.716 \$                               |                             |            |           |

As listed in Table S8, based on 1.0 kg spent LiFePO<sub>4</sub> cathode powders, the total costs and profits in the laboratory-scale recycling process were calculated in detail. Chemicals such as H<sub>2</sub>O<sub>2</sub> and DL-malic acid were consumed in the whole recycling process, and the costs of water, electricity, and labour treatment are also taken into account in the economic analysis. It is estimated that 730 g FePO<sub>4</sub>, 22 g Li<sub>3</sub>PO<sub>4</sub>, and 195 g Li<sub>2</sub>CO<sub>3</sub> could be obtained from the treatment of 1.0 kg waste LiFePO<sub>4</sub> cathode materials. Ultimately, the profit of recycling 1.0 kg spent LiFePO<sub>4</sub> cathode powders is \$1.716.

**Table S7.** A comparison of different recovery processes for SLFP.

| Oxidant                                                                                               | Condition                                  | Leaching efficiency          | Reagent cost | Energy and equipment cost | Characteristics                                       | Ref.      |
|-------------------------------------------------------------------------------------------------------|--------------------------------------------|------------------------------|--------------|---------------------------|-------------------------------------------------------|-----------|
| n (DL-malic acid/Li) = 0.435, 4 vol.% H <sub>2</sub> O <sub>2</sub>                                   | 100 g/L, 25°C, 30 min                      | 99.12% Li, 0.81% Fe, 1.42% P | Low          | Low                       | High efficiency and green process                     | This work |
| 0.3 M H <sub>2</sub> SO <sub>4</sub> , n (H <sub>2</sub> O <sub>2</sub> /Li) = 2.07                   | 60°C, 2 h                                  | 97% Li, 0.027% Fe, 1.95% P   | High         | High                      | High selectivity while large reagent consumption      | [2]       |
| 2.5 M H <sub>2</sub> SO <sub>4</sub> , High-Temperature Oxidation                                     | 60°C, 4 h, 100 g/L                         | 97% Li, 0.027% Fe            | High         | High                      | High cost and harsh conditions                        | [3]       |
| n (HCl /Li) = 0.8, n (NaClO/Li) = 1                                                                   | 60min, 50-80°C, 1-4 g/mL                   | 97% Li, < 2% Fe.             | Low          | High                      | High leaching efficiency while harsh conditions       | [4]       |
| n (Fe <sub>2</sub> (SO <sub>4</sub> ) <sub>3</sub> /LFP =1:6), 0.6 mL/g H <sub>2</sub> O <sub>2</sub> | 400 g/L, 60°C, 30 min                      | 96.5% Li                     | Low          | Low                       | Selective leaching while low leaching efficiency      | [5]       |
| 1.0 M HCOOH, 5 vol. % H <sub>2</sub> O <sub>2</sub>                                                   | 30 min, 10 g/L, 30°C                       | 97.92 % Li, <0.5% Fe/P       | High         | High                      | High efficiency while high cost                       | [6]       |
| 100% Lemon juice, 6 vol% H <sub>2</sub> O <sub>2</sub>                                                | 67 g/L, 60 min                             | 94.83% Li, 4.05% Fe, 0.84% P | High         | Low                       | Green process while low selectivity                   | [7]       |
| 4 M MSA, 18 vol. % H <sub>2</sub> O <sub>2</sub>                                                      | 80 g/L, room temperature, 90 min           | 94% Li, 95% Fe               | High         | Low                       | Mild reaction condition while non-selective leaching  | [8]       |
| 0.8 M CH <sub>3</sub> COOH, 6 vol% H <sub>2</sub> O <sub>2</sub>                                      | 120 g/L, 50°C, 30 min                      | 95.05% Li, 0.93% Fe          | Low          | Low                       | Mild reaction condition while low leaching efficiency | [9]       |
| Air (flow rate of 600 mL· min <sup>-1</sup> )                                                         | pH=3.5, 25 °C, 10 mL·g <sup>-1</sup> , 5 h | 99.3% Li, 0.02% Fe/P         | Low          | High                      | High selectivity while complex operation              | [1]       |
| 15 vol. % H <sub>2</sub> O <sub>2</sub>                                                               | 30 min, 50 °C, 10 g/L                      | 97.6% Li                     | Low          | High                      | High efficiency while high cost                       | [10]      |
| n (Na <sub>2</sub> S <sub>2</sub> O <sub>8</sub> /LFP) =1.05                                          | 300 g/L, 25°C, 20 min                      | 99% of Li                    | Low          | Low                       | High efficiency and low cost                          | [11]      |

|                                                                      |                         |                         |      |     |                                    |      |
|----------------------------------------------------------------------|-------------------------|-------------------------|------|-----|------------------------------------|------|
| $n$<br>$((\text{NH}_4)_2\text{S}_2\text{O}_8/\text{LFP})$<br>$= 1.4$ | 30 min, 30°C,<br>50 g/L | 98.1% Li,<br><1% Fe/ Al | High | Low | High efficiency<br>while high cost | [12] |
|----------------------------------------------------------------------|-------------------------|-------------------------|------|-----|------------------------------------|------|

---



## References:

- 1 H. Jin, J. Zhang, D. Wang, Q. Jing, Y. Chen and C. Wang, *Green Chem.*, 2022, **24**, 152-162.
- 2 H. Li, S. Xing, Y. Liu, F. Li, H. Guo and G. Kuang, *ACS Sustainable Chem. Eng.*, 2017, **5**, 8017-8024.
- 3 R. Zheng, L. Zhao, W. Wang, Y. Liu, Q. Ma, D. Mu, R. Li and C. Dai, *RSC Adv.*, 2016, **6**, 43613-43625.
- 4 T. Yan, S. Zhong, M. Zhou, X. Guo, J. Hu, F. Wang, F. Zeng and S. Zuo, *Nanotechnol. Rev.*, 2020, **9**, 1586-1593.
- 5 Y. Dai, Z. Xu, D. Hua, H. Gu and N. Wang, *J. Hazard. Mater.*, 2020, **396**, 122707.
- 6 H. Mahandra and A. Ghahreman, *Resour., Conserv. Recycl.*, 2021, **175**, 105883.
- 7 J. Kumar, X. Shen, B. Li, H. Liu and J. Zhao, *Waste Manage.*, 2020, **113**, 32-40.
- 8 P. Yadav, C.J. Jie, S. Tan and M. Srinivasan, *J. Hazard. Mater.*, 2020, **399**, 123068.
- 9 Y. Yang, X. Meng, H. Cao, X. Lin, C. Liu, Y. Sun, Y. Zhang and Z. Sun, *Green Chem.*, 2018, **20**, 3121-3133.
- 10 X. Qiu, B. Zhang, Y. Xu, J. Hu, W. Deng, G. Zou, H. Hou, Y. Yang, W. Sun, Y. Hu, X. Cao and X. Ji, *Green Chem.*, 2022, **24**, 2506-2515.
- 11 J. Zhang, J. Hu, Y. Liu, Q. Jing, C. Yang, Y. Chen and C. Wang, *ACS Sustainable Chem. Eng.*, 2019, **7**, 5626-5631.
- 12 D. Peng, J. Zhang, J. Zou, G. Ji, L. Ye, D. Li, B. Zhang and X. Ou, *J. Clean Prod.*, 2021, **316**, 128098.
- 13 <https://www.100ppi.com/DL-malic acid-prices-update>, (accessed June 12, 2023).
- 14 <https://www.100ppi.com/hydrogen peroxide-prices-update>, (accessed June 12, 2023).
- 15 <https://www.100ppi.com/sodium hydroxide-prices-update>, (accessed June 12, 2023).
- 16 <https://www.100ppi.com/sodium carbonate-prices-update>, (accessed June 12, 2023).
- 17 <https://www.100ppi.com/iron phosphate-prices-update>, (accessed June 12, 2023).
- 18 <https://www.100ppi.com/lithium phosphate-prices-update>, (accessed June 12, 2023).
- 19 <https://www.100ppi.com/lithium carbonate-prices-update>, (accessed June 12, 2023).
